# Quantifying the Invasive Secondary Metabolome

1  
2  
3  
4  
5  
6  
7  
8  
9  
10  
11  
12  
13  
14  
15  
16  
17  
18  
19  
20  
21  
22  
23  
24  
25  
26  
27  
28  
29  
30  
31  
32

Jamila Rowland-Chandler<sup>1</sup>, Ewan Salter<sup>1</sup>, Suresh Babu<sup>2</sup>, Gitanjali Yadav<sup>1,3\*</sup>

<sup>1</sup>Department of Plant Sciences, University of Cambridge, Downing Street, Cambridge, CB2 3EA, UK

<sup>2</sup>School of Human Ecology, Ambedkar University Delhi (AUD), Lothian Road, Kashmere Gate, Delhi-110006, India

<sup>3</sup>National Institute of Plant Genome Research, Aruna Asaf Ali Marg, New Delhi-110067, India

\*Author for Correspondence

[gy246@cam.ac.uk](mailto:gy246@cam.ac.uk), [gy@nipgr.ac.in](mailto:gy@nipgr.ac.in)

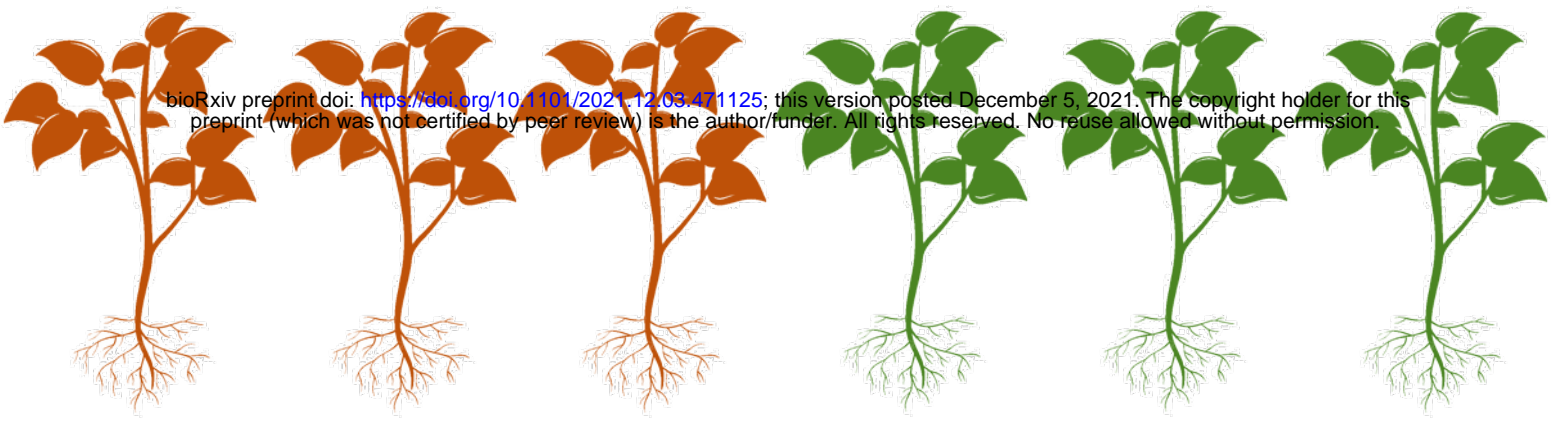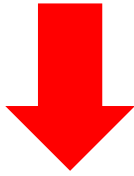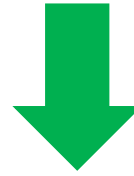

|   | $\alpha$ -curcumene | $\beta$ -pinene | 1,8-cineole | ... |   | $\alpha$ -curcumene | $\beta$ -pinene | 1,8-cineole | ... |
|---|---------------------|-----------------|-------------|-----|---|---------------------|-----------------|-------------|-----|
| 1 | 1                   | 1               | 0           |     | 1 | 1.5                 | 6.34            | 0           |     |
| 2 | 1                   | 0               | 0           |     | 2 | 4                   | 0               | 0           |     |
| 3 | 1                   | 0               | 1           |     | 3 | 1.55                | 0               | 0.5         |     |
| 4 | 1                   | 1               | 0           |     | 4 | 5                   | 10              | 0           |     |
| 5 | 0                   | 0               | 1           |     | 5 | 0                   | 0               | 0.6         |     |
| : |                     |                 |             |     | : |                     |                 |             |     |

  

|                     | $\alpha$ -curcumene | $\beta$ -pinene | 1,8-cineole | ... |
|---------------------|---------------------|-----------------|-------------|-----|
| $\alpha$ -curcumene | 0                   | 0.78            | 0.97        |     |
| $\beta$ -pinene     | 0.78                | 0               | 0.94        |     |
| 1,8-cineole         | 0.97                | 0.94            | 0           |     |
| :                   |                     |                 |             |     |

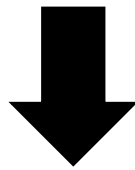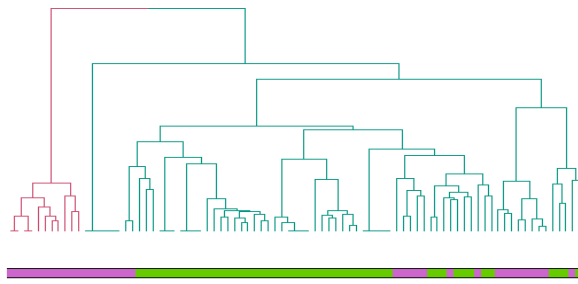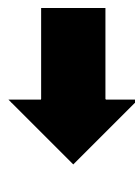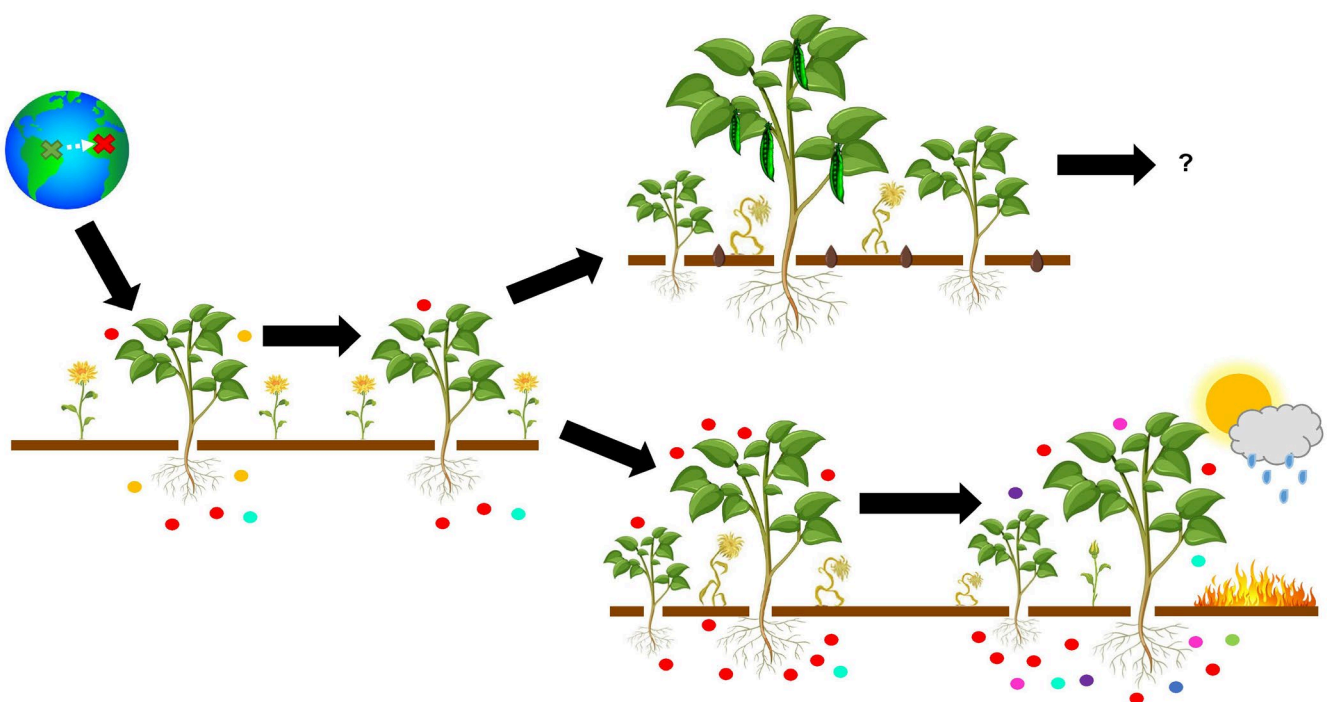

33

34

---

## 35 Abstract

36

37 Invasive plants drive ecosystem degradation through developing aggressive phenotypes that  
38 can outcompete native flora. Several hypotheses explain this, like the Evolution of Increased  
39 Competitive Ability hypothesis and the Novel Weapons Hypothesis, but none have been  
40 proven conclusively. Changes in plant metabolites are critical to these hypotheses, but  
41 complete invasive secondary metabolomes have not been quantified. Here, statistical and  
42 unsupervised machine-learning approaches were used to analyse chemotype-to-phenotype  
43 relationships in invasive and non-invasive populations in species *Ageratum conyzoides*,  
44 *Lantana camara*, *Melaleuca quinquenervia* and *Psidium cattleianum* and on a family level  
45 analysing *Asteraceae*, *Myrtaceae* and *Verbenaceae*. Invasive metabolomes evolved  
46 according to the EICA and NWH, involving optimisation of aggressive strategies present in  
47 native populations and local adaptation.

48

---

49

50 **Keywords:** *Invasivity; Evolution of Increased Competitive Ability; Novel Weapons Hypothesis;*  
51 *Multi-omics; Chemotype*

52

## 53 1. Introduction

54

55 Globalisation and anthropogenic movement have driven the mass emergence and spread of  
56 invasive plants. Invasives have higher fitness than native flora from experiencing less disease  
57 (Mitchel *et al.*, 2003; Torchin *et al.*, 2003), variably reduced herbivory and weakened  
58 competition from native plants. Therefore, invasives can proliferate wildly, so controlling  
59 these species is costly (Senator *et al.*, 2017). Understanding invasive evolution in non-native  
60 plants is thus important in identifying which plants will become invasive and susceptible  
61 ecosystems that can be prioritised for protection by conservationists.

62 Two hypotheses addressing invasive plant evolution are the Evolution of Increased  
63 Competitive Ability hypothesis (EICA) and the Novel Weapons Hypothesis (NWH). EICA  
64 states plants in non-native environments will downregulate and lose defences against  
65 specialist herbivores and pathogens absent from non-native regions, allowing for resource  
66 reallocation to enhance growth and development to induce a rapidly proliferating invasive  
67 phenotype (Blossey and Notzold, 1995). NWH states some invasive plants produce novel  
68 compounds not found in native flora, involved in allelopathy (plant-plant “warfare”),  
69 generalist defence and other antagonistic strategies that increase competitive advantage  
70 (Cappuccino and Arnason, 2006). Thus, invasives outcompete native flora. Invasives will

71 invest in producing these and new derived compounds to further increase competitive  
72 advantage (Callaway and Ridenour, 2004). Both hypotheses are underpinned by  
73 biochemistry. Plants secondary metabolomes have high chemical diversity, or  
74 chemodiversity, so plant-environment interactions, including those involved in invasive  
75 populations, are extensively mediated by secondary metabolites. In the EICA, divestment  
76 from specialist defence should involve divestment from related metabolite production and  
77 investment into different biochemistry. In the NWH, novel secondary metabolites mediate  
78 novel allelopathy and other plant-environment interactions in the invasive and these  
79 metabolites should increase in production and diversify. Therefore, metabolomes provide  
80 important insights into invasivity.

81 However, there is debate on whether the EICA or NWH are universally true across all  
82 invasives (Parker and Hay, 2005). This is in part because proving these hypotheses has been  
83 limited by lack of analysis of complete invasive secondary metabolomes. Previous research  
84 focused on assaying invasive chemical exudates on native flora and fauna, with varying  
85 agreement on whether the EICA or NWH are true (Lind and Parker, 2010; Siemann and  
86 Rogers, 2003), without identifying the compounds involved. Although some studies  
87 identified multiple important compounds (Cappuccino and Arnason, 2006), most focused on  
88 individual compounds or broad effects of chemical families only (Inderjit *et al.*, 2006; Hull-  
89 Sanders *et al.*, 2007). Therefore, important chemical variation of interest has been removed  
90 and combinatorial effects of multiple compounds have not been considered. Computational  
91 multi-omics approaches that can tackle large datasets could evaluate chemotype-to-  
92 phenotype relationships from invasive secondary metabolomes, so interdisciplinary  
93 approaches are needed to tackle questions in invasive plant evolution. Furthermore, very  
94 little research has studied the EICA and NWH together, which likely interact in many species  
95 (Qin *et al.*, 2013; Zheng *et al.*, 2015). Outside these major hypotheses, there has been  
96 limited study on long-term invasive secondary metabolism evolution after the emergence of  
97 aggressive phenotypes, and thus how competitive advantage may shift (Strayer *et al.*, 2006).  
98 All these gaps in knowledge need to be addressed.

99 In this study, we set out to evaluate whether EICA and NWH hypotheses are true, either in  
100 conjunction or independently, through analysing secondary metabolomes, as these  
101 hypotheses are likely to be at least partially evident from chemistry alone. The native  
102 ecology of invasives may also determine to what extent strategies predicted by the EICA and  
103 NWH are implemented in invasive populations. Invasive secondary metabolome evolution  
104 should associate with environmental and ecological factors in non-native regions, explaining  
105 how invasives can proliferate in the long-term and why some ecosystems are more  
106 susceptible to invasive takeover. To investigate these hypotheses, a meta-analysis of the  
107 chemical composition of essential oils of invasive and non-invasive populations across  
108 several species was conducted, allowing the chemical evolution of the invasive from native  
109 populations to be studied. Unsupervised Machine Learning methods like cluster analysis  
110 were used to compare chemical composition between plants. This was appropriate for  
111 identifying underlying patterns in variation of compound diversity, production levels and  
112 chemical relationships between metabolites from large datasets. Similarity-based measures  
113 and robust statistical testing were also used to analyse trends and to tolerate the high

114 variance present in datasets. From this analysis, we determined chemistry of all invasives  
115 studied followed both or individually the EICA and NWH to varying degrees, where invasives  
116 evolved to optimise pre-existing aggressive strategies whilst responding to some selection  
117 pressures in the non-native environment.

## 118 **2. Methods**

119  
120 Data extraction and statistical and computational analysis were performed in the statistical  
121 computing software “R” (Version 4.0.2, <http://www.r-project.org>).

### 122 **2.1 Data Collection**

#### 123 **2.1.1 Plant Chemical Profiles**

124  
125  
126 Invasive plant species were identified through GISD “100 most invasive species” and  
127 EssoilDB (The Global Invasive Species Database; Kumari *et al.*, 2014). *Lantana camara*,  
128 *Melaleuca quinquenervia*, *Psidium cattleianum* and *Ageratum conyzoides* were selected for  
129 data availability reasons. Essential oil chemical composition, or profiles, were extracted from  
130 EssoilDB source articles using web-trawling methods with packages XML, rvest and stringr or  
131 from raw datafiles (CABI 2020). Further profiles were collected manually from primary  
132 literature (Riaz *et al.*, 1995; Philippe *et al.*, 2002; Zoghbi *et al.*, 2007; Monti *et al.*, 2009; Nitin  
133 *et al.*, 2010; Tesch *et al.* 2011; Castro *et al.*, 2015; Kouame *et al.*, 2018). Profiles with  
134 reasonably complete-looking metabolomes were selected so that the data partly reflected  
135 the complete population chemodiversity. Most of the data for plant families was extracted  
136 separately from EssoilDB and the compiled with the species data.

137  
138 Compounds present and % amount of each in the essential oils (as determined by GC-MS),  
139 location and date of sampling where possible were extracted. Whether the plant was native,  
140 non-native or reported as invasive in the country of sampling were identified through GISD  
141 and CABI (The Global Invasive Species Database, CABI 2020).

#### 142 **2.1.2 Environmental and Ecological Factors**

143  
144  
145 Climatic data was collected from Wikipedia and forecast websites  
146 (<https://www.weatherandclimate.com>, <https://www.weather2visit.com>,  
147 <https://weatherspark.com>) from the closest major city to the plant sampling site, as data  
148 for rural areas was sparse. Average annual precipitation (mm), average monthly high  
149 temperature (°C), average monthly low temperature (°C), average monthly relative humidity  
150 (%) and elevation (m) were sampled. Flood risk was estimated from news articles and flood  
151 warnings. Disturbance data was obtained from global forest watch databases from the  
152 province the plant sampling site was located (Global Forest Watch): % total tree cover loss  
153 (2001-2019), total VIIRS alerts per annum (2020) and presence of anthropogenic activity.

154

155 Packages *rgbif* and *Countrycode* were used to measure *Plantae* and *Animalia* (for plant  
156 species data only) Species richness (SR) per country from which plants were sampled. This  
157 was calculated from number of unique species from each kingdom where occurrence  
158 coordinates were known in GBIF databases (GBIF.org). Per country data, +/- 10yrs from  
159 plant sampling date where known, or from 1980-2020 where sampling date was not, was  
160 selected as occurrence records were too inconsistent to calculate SR of the year of plant  
161 sampling. This assumed most easily surveyable species in a country would be identified in a  
162 20yr survey period, so the 20yr and 40yr records would be similar.

163

## 164 **2.2 Data Normalisation**

165

166 Species names were normalised using *Taxise*-package. Plant part sampled, invasivity and  
167 native/non-native status, flood risk and presence of anthropogenic activity were normalised  
168 to binary data through non-package associated code so that categorical data was  
169 consistently named. Country was converted to factorial data. Other data was kept raw and  
170 numeric. Compounds common names, given in the literature, were converted to Canonical  
171 SMILES using packages *webchem*, *rJava* and *rcdk*. SMILES were converted to 1024-bit  
172 Morgan Circular Fingerprints using packages *rcdk* and *rcdklibs*. Profiles and corresponding  
173 plant features, environmental and ecological factors were stored as feature vectors. One  
174 data matrix with binary presence and absence of compounds, the other with production  
175 rates as % amounts were constructed.

176

## 177 **2.3 Computational and Statistical Analysis**

178

179 Two matrices were produced – one for data by species, the other by family. The species  
180 matrix had information on compound production, whereas the family matrix was binary  
181 presence/absence data. Computation and statistical analysis were conducted on invasive  
182 and non-invasive populations for all species families except *A. conyzoides* and *Asteraceae*,  
183 where native and non-native populations were compared, as this species was recorded to  
184 be non-invasive in many countries in its non-native range. Methods applied to quoted  
185 invasive/non-invasive and non-native/native population sets were consistent.

186

### 187 **2.3.1 Initial Plots and Statistics**

188

189 Individual chemical profiles were plotted using *heatmap*-package. To measure the  
190 variation between all chemical profiles, thus determining if there was divergence between  
191 profiles, pairwise Bray-Curtis dissimilarity between profiles was calculated from binary  
192 presence/absence compound data using the *vegan*-package, then converted to a distance  
193 matrix and mean dissimilarity was calculated.

194

### 195 **2.3.2 Profile Size Analysis**

196

197 Chemical profile size was calculated from total number of distinct SMILES per profile. Due to  
198 unequal variance, Kruskal-Wallis and Mann-Whitney non-parametric tests were used to  
199 compare profile size between species and invasive and non-invasive populations within and  
200 between species.

201

### 202 **2.3.3 Profile Clustering**

203

204 Clustering algorithms were applied to presence/absence and % amounts profile datasets to  
205 assess divergence between invasive and non-invasive populations. Hierarchical clustering  
206 was performed per species using the factoextra-package with a defined cluster number:  $k =$   
207 2, using Euclidean distances and the Ward clustering algorithm. The clusters obtained were  
208 validated with the expected clustering – invasive and non-invasive – using the fpc-package  
209 to assess strength of similarity. Adjusted Rand Index was the similarity measure used.

210 Hierarchical clustering was also used to assess divergence in chemical structural diversity  
211 between invasive and non-invasive populations. From a Tanimoto's distance matrix of all  
212 compounds identified, pairwise distance between group centroids of profiles per species  
213 was calculated using ANOVA-like tests with usedist-package. Each group was the  
214 compounds present in a profile. A new distance matrix between profiles was constructed  
215 and clustered using factoextra-package with same methods as previously stated. The  
216 clusters obtained were validated with expected invasive/non-invasive clustering with  
217 methods pre-stated.

218 Annotated dendrograms were plotted with dendextend-package.

219

### 220 **2.3.4 Changes in structurally related compound production unique-to-** 221 **population synthesis**

222

223 To determine whether compound production differed between invasive and non-invasive  
224 populations from the species matrix, Kruskal-Wallis non-parametric tests were calculated  
225 for each compound shared between some invasive and non-invasive populations; profiles  
226 that did not produce the compound were denoted 0% production. Whether there was any  
227 chemical similarity between the compounds with altered production was also assessed to  
228 identify functional convergence within invasive and non-invasive profiles. K-medoids  
229 clustering was implemented on a Tanimoto's distance matrix of all compounds to determine  
230 structural grouping between compounds using cluster-package. The optimal cluster number  
231 was found using the average silhouette method with the Euclidian distance metric using  
232 cluster-package. Exact tests were implemented to evaluate difference in proportion of  
233 compounds belonging to each cluster upregulated and downregulated in invasive compared  
234 to non-invasive populations. Chi-squared and exact tests were used to compare proportion  
235 of compounds per cluster unique to invasive and unique to non-invasive populations. For  
236 the family matrix, because the difference in sample sizes between populations was large,  
237 where possible a bootstrapping method was also used to compare equal sample sizes.

238 Range and Average number of unique-to-population compounds and the p-values from  
239 multiple statistical tests were reported. Bootstrapping was iterated 10 times.

240

### 241 **2.3.5 Evaluating the impact of environmental and ecological factors on** 242 **invasive chemical profiles.**

243

244 To assess whether there was invasive evolution in response to environmental and ecological  
245 factors in non-native regions, linear and generalised linear models (GLM) were run. Data  
246 from invasive populations of *L. camara* only, as no other species had sufficient data, on  
247 average compound production per cluster per profile was modelled using environmental  
248 and ecological factors in a robust linear model (RLM) using Mass-package. This was to  
249 determine whether chemical similarity and production levels associated with the local  
250 environment. The significance of explanatory variables was evaluated using Ward tests from  
251 sfsmisc-package. *L. camara* only and cluster 1 and 2 had sufficient data to be analysed. For  
252 the family data, compound enrichment per cluster for all families was modelled using a  
253 Poisson GLM to evaluate the effects of environmental and ecological factors. One model per  
254 cluster was created and within clusters models each containing one of three were created  
255 to ensure meaningful data was not removed from the analysis. All clusters were analysed  
256 bar cluster 6 due to 0 inflation.

257

## 258 **3. Results**

### 259 **3.1 There is high variance in metabolome composition within** 260 **species**

261

262 The family and species analysis can be distinguished as follows: the species data contains  
263 data from *A. conyzoides*, *L. camara*, *M. quinquenervia* and *P. cattleinum*; the family data  
264 includes *Asteraceae* (*A. conyzoides* and other non-native and native species), *Verbenaceae*  
265 (*L. camara* only) and *Myrtaceae* (*M. quinquenervia* and *P. cattleinum*, plus some non-  
266 invasive species). Across all species and families there was high variation in the composition,  
267 chemical diversity and production levels of the chemical profiles collected (Fig. 1).

268 Therefore, there is evidence of metabolomic divergence within species and families, which  
269 could be attributed to differences in evolution between invasive (or non-native) and non-  
270 invasive (or native populations).

271

### 272 **3.2 Broad chemodiversity-related strategies differ between species,** 273 **but show evolutionary divergence between populations**

274

275 According to the EICA and NWH, invasive chemical profiles may change in size and  
276 chemodiversity as compounds are lost and metabolic diversity may radiate during evolution  
277 in non-native environments. Therefore, convergent evolution in invasive populations can be



A

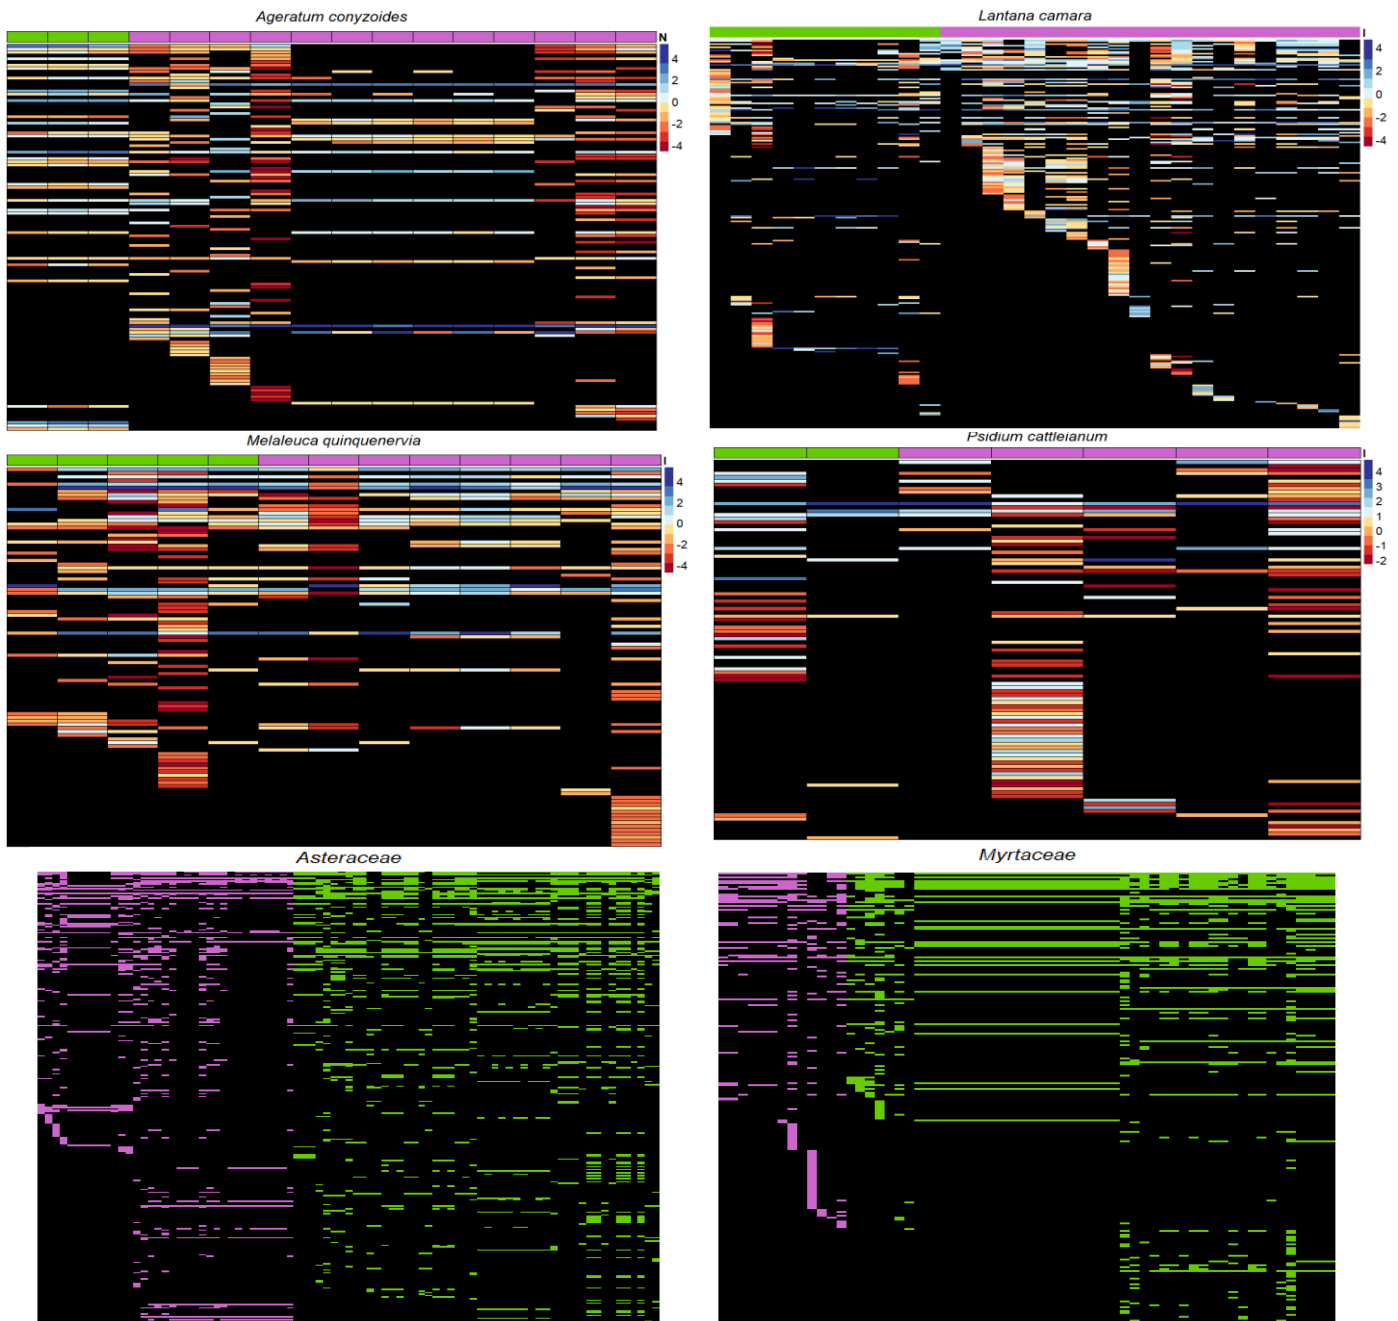

B

| Species/Family                      | N  | Total Compounds | Average Profile Size (p-value) |
|-------------------------------------|----|-----------------|--------------------------------|
| <b><i>A. conyzoides</i></b>         |    |                 |                                |
| Non-Native                          | 13 | 114             | 30.00 (0.835)                  |
| Native                              | 3  | 31              | 32                             |
| <b><i>L. camara/Verbenaceae</i></b> |    |                 |                                |
| Invasive                            | 20 | 208             | 38.50 (0.027*)                 |
| Non-Invasive                        | 11 | 132             | 25.00                          |
| <b><i>M. quinquenervia</i></b>      |    |                 |                                |
| Invasive                            | 8  | 63              | 21.00 (0.074)                  |
| Non-Invasive                        | 5  | 80              | 43.0                           |
| <b><i>P. cattleianum</i></b>        |    |                 |                                |
| Invasive                            | 5  | 85              | 19.0 (0.434)                   |
| Non-Invasive                        | 2  | 33              | 19.50                          |
| <b>Asteraceae</b>                   |    |                 |                                |
| Non-Native                          | 35 | 177             | 37.00 (0.015*)                 |
| Native                              | 50 | 222             | 20.00                          |
| <b>Myrtaceae</b>                    |    |                 |                                |
| Invasive                            | 13 | 119             | 20.00 (0.0164*)                |
| Non-Invasive                        | 50 | 185             | 25.00                          |

**Fig. 1.** Summary of the chemical diversity observed in the chemical profiles. (a) Individual chemical profiles. Top and centre plot cell colours illustrate  $\log(\text{compound production})$  and the annotation bar shows which profiles are invasive or non-native (purple) and which are non-invasive or (green). For the bottom plots, coloured cells indicate compound presence and are coloured according to whether the profile is from an invasive/non-native (purple) or non-invasive /native populations. (b) Initial statistics from the chemical profiles between invasive or non-invasive or non-native and native populations. Average profile size is estimated from the median number of compounds per profile and p-values are from Kruskal-Wallis tests comparing profile size.

278 initially assessed through investigating profile size and chemodiversity. Total chemodiversity  
279 was generally higher in invasive than non-invasive species profiles, but *M. quinquenervia*  
280 and families *Asteraceae* and *Myrtaceae* showed the opposite (Fig. 1b). There were no  
281 obvious trends in number of compounds produced per plant between invasive/non-native  
282 and non-invasive/native populations across all species (Fig. 1b) and there was no significant  
283 difference in profile size between populations when comparing all species and families  
284 (Kruskal-Wallis,  $H(1) = 1.10$ ,  $p = 0.294$ ;  $H(1) = 0.000640$ ,  $p = 0.980$ ). However, there were  
285 differences in profile size within taxa; *L. camara* and *Asteraceae* had expanded whereas *M.*  
286 *quinquenervia* and *Myrtaceae* reduced in invasive populations, all statistically significant  
287 (Fig. 1b). *P. cattleianum* and *A. conyzoides* had similar profile sizes between populations.  
288 Therefore, invasives have diverged from non-invasive metabolomes, but evolutionary  
289 strategies are inconsistent across taxa  
290

### 291 **3.3 Invasive populations show chemical divergence, but share** 292 **similarities in production levels and chemical properties of the** 293 **secondary metabolome**

294  
295 2-Cluster analysis showed there was not strong segregation between invasive or non-native  
296 and non-invasive or native populations of all taxa when clustering profiles according to  
297 chemical composition chemical similarity and compound production (the last for species  
298 only). (Fig. 2a). On the other hand, from inspection, within clusters invasive and non-  
299 invasive profiles tend to cluster together, suggesting there is some consistency in profiles  
300 within populations. However, similarity measures did not show these trends, although from  
301 taxa with larger more robust datasets, like *L. camara* and *Asteraceae*, chemical similarity  
302 and production levels are stronger signals of invasivity than chemical composition, showing  
303 greater agreement with expected invasive/non-invasive clustering (Fig. 2b). The same was  
304 shown for production levels *M. quinquenervia* once biasing chemotype compounds were  
305 removed, and less obviously in *A. conyzoides* as clustering completely changed from  
306 chemical composition and similarity dendrograms, which were biased by the sampling of  
307 same compounds. Contrastingly, these trends in relation to chemical similarity and  
308 production were not seen in *P. cattleianum* and *Myrtaceae*. Therefore, generally  
309 metabolomes of non-native or invasive populations could show functional similarity.  
310 Additionally, native/non-invasive populations may have undergone more similar chemical  
311 evolution than non-native/invasive populations. Native/non-invasive populations tend to  
312 segregate in larger sub-clusters than non-native/invasive populations and non-  
313 native/invasive profiles formed multiple small clusters often grouped with individual  
314 native/non-invasive profiles (Fig. 2a). This suggests individual invasive profiles show greater  
315 and more rapid divergent evolution. Alternatively, some native populations could have an  
316 “invasive-like” phenotype, so could be primed for invasivity once introduced to non-native  
317 environments. Thus, invasive populations may have metabolically radiated from each other,  
318 but show important similarities between compound production levels and the chemical  
319 similarity of profiles.

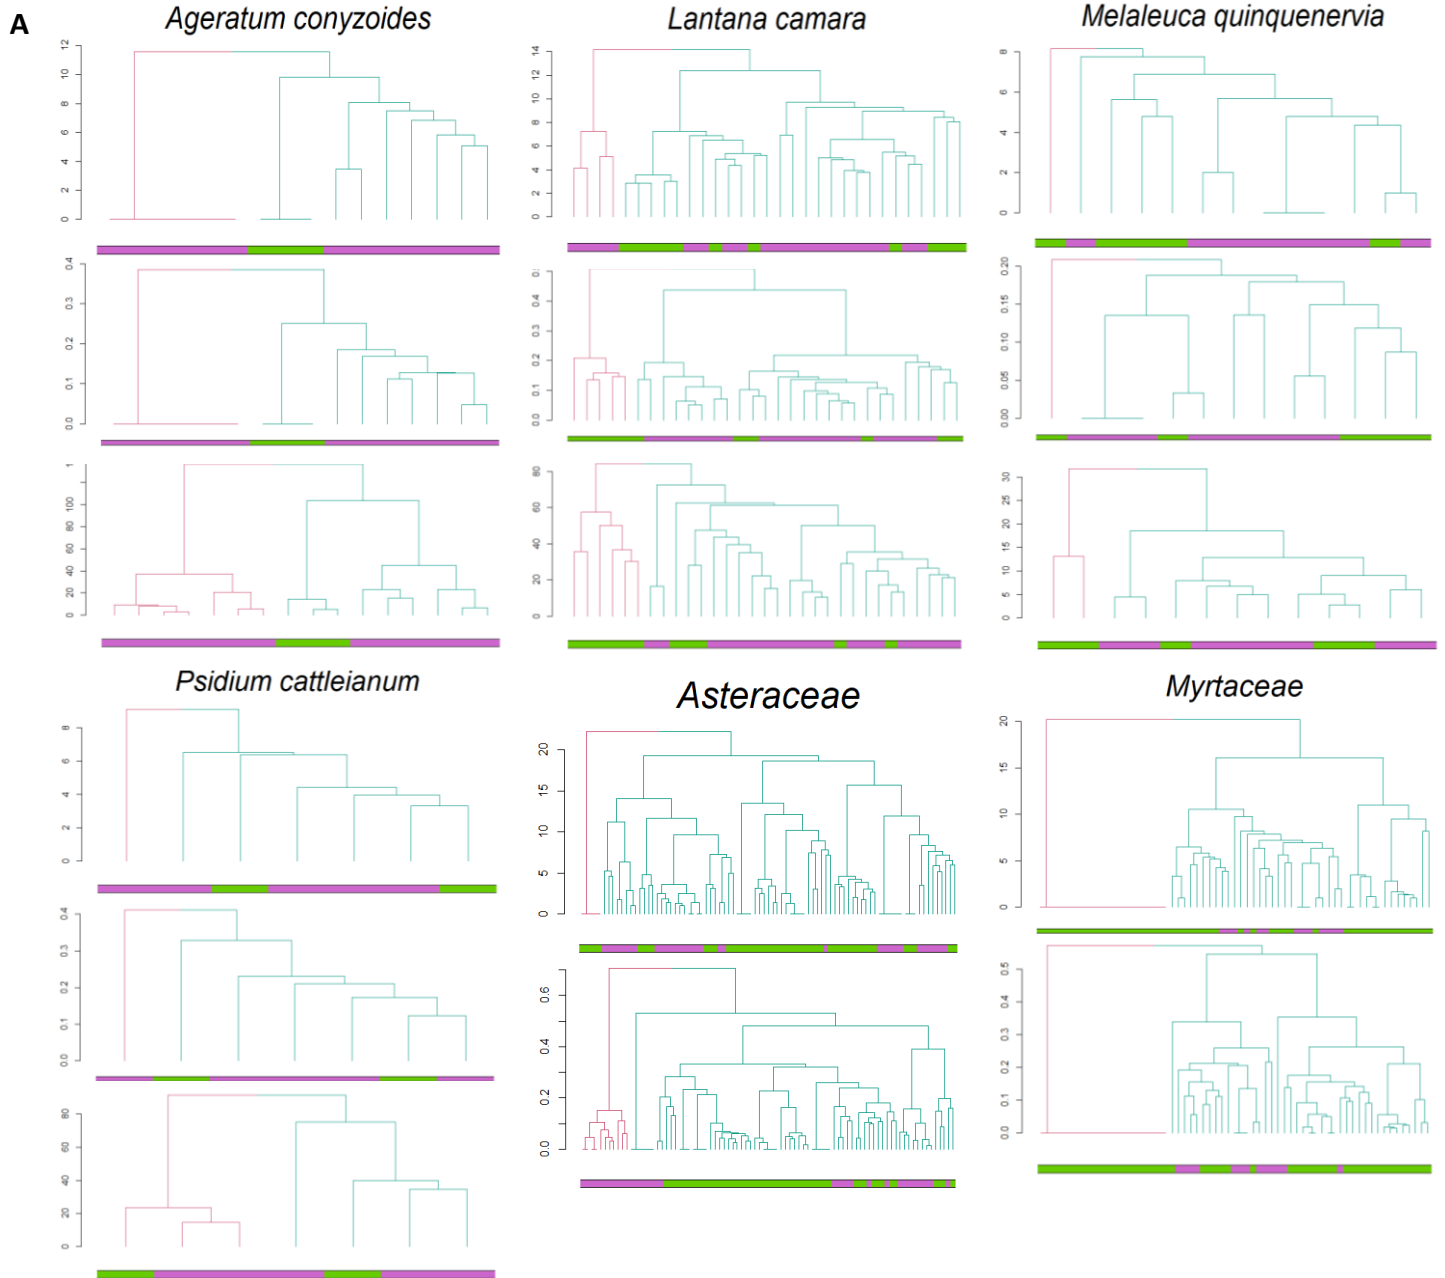

**B**

|                            | Native and Non-Native Grouping            | Production Amounts         | Chemical Similarity        |                            | Invasive and Non-Invasive Grouping        | Production Amounts         | Chemical Similarity        |
|----------------------------|-------------------------------------------|----------------------------|----------------------------|----------------------------|-------------------------------------------|----------------------------|----------------------------|
| <b>Presence / Absence</b>  | 0.05                                      | 0.05                       | 1                          | <b>Presence / Absence</b>  | 0.0629                                    | 0.1151                     | 0.1148                     |
| <b>Production Amounts</b>  | 0.0172                                    |                            | 0.05                       | <b>Production Amounts</b>  | 0.4230                                    |                            | 0.8470                     |
| <b>Chemical Similarity</b> | 0.05                                      |                            |                            | <b>Chemical Similarity</b> | 0.3392                                    |                            |                            |
|                            | <b>Invasive and Non-Invasive Grouping</b> | <b>Production Amounts</b>  | <b>Chemical Similarity</b> |                            | <b>Invasive and Non-Invasive Grouping</b> | <b>Production Amounts</b>  | <b>Chemical Similarity</b> |
| <b>Presence / Absence</b>  | 0.0930                                    | 0.5593                     | 0.8333                     | <b>Presence / Absence</b>  | 0.1667                                    | 0.0769                     | 1                          |
| <b>Production Amounts</b>  | 0.2392                                    |                            | 0.5593                     | <b>Production Amounts</b>  | 0.1351                                    |                            | 0.0769                     |
| <b>Chemical Similarity</b> | 0.0930                                    |                            |                            | <b>Chemical Similarity</b> | 0.1667                                    |                            |                            |
|                            | <b>Invasive and Non-Invasive Grouping</b> | <b>Chemical Similarity</b> |                            |                            | <b>Native and Non-Native Grouping</b>     | <b>Chemical Similarity</b> |                            |
| <b>Presence / Absence</b>  | 0.0435                                    | 1                          |                            | <b>Presence / Absence</b>  | 0.0240                                    | 0.0702                     |                            |
| <b>Chemical Similarity</b> | 0.0435                                    |                            |                            | <b>Chemical Similarity</b> | 0.171                                     |                            |                            |

**Fig. 2.** Clustering of invasive and non-invasive or non-native and native chemical profiles. (a) Hierarchical clustering analysis of chemical profiles based on presence and absence data (top), structural diversity of compounds (middle) and compound production level (%) data (bottom) in each profile (bottom). Profiles were clustered into two groups, shown by branch colouring, using Euclidean distance measures and the Ward Clustering algorithm and annotated to show which profiles were invasive/non-native (purple) or non-invasive/native (green). (b) Similarity matrices between true and expected invasive/non-invasive or non-native/native clustering and between the clustering for each data type. From top left, clockwise: *A. conyzoides* (*Asteraceae*), *L. camara* (*Verbenaceae*), *P. cattleianum*, *Compositae*, *Myrtaceae* and *M. quinquenervia*. Similarity between two-group clustering is calculated using a modulus adjusted Rand index.

320

### 321 **3.4 Production levels and unique-to-population synthesis of** 322 **structural similar compounds reveals strong distinction between** 323 **populations**

324

325 Many compounds had different production rates between non-invasive/native and  
326 invasive/non-native populations in all species (Fig. 3b, 3d). A number of individual  
327 compounds had significantly altered production between populations in *A. conyzoides* and  
328 *L. camara*, but for many the difference was non-significant, and no compounds had  
329 significantly different production in *M. quinquenervia* and *P. cattleainum* (Fig. 4d).  
330 Furthermore, species differed in terms of the number of compounds upregulated and  
331 downregulated in invasive populations – *L. camara* and *M. quinquenervia* had more  
332 upregulated compounds, *A. conyzoides* and *P. cattleainum* had more downregulated.  
333 However, when compounds were clustered according to structural similarity, trends  
334 between species were observed. All species but *P. cattleainum* had an overrepresentation  
335 of cluster 1, but this was only significant for *L. camara* and downregulated compounds in *A.*  
336 *conyzoides* (Fig. 3b). Additionally, the compounds with significantly different production  
337 were mainly found in cluster 1. Deviation from expected cluster proportions was not shown  
338 for any other groups except cluster 3 in *L. camara*, which were significantly  
339 underrepresented. Therefore, invasivity could be driven by altering production levels of  
340 chemically similar compounds and by the additive effects of many rather than a few key  
341 compounds.

342

343 High numbers of compounds unique to populations, so were found exclusively in one  
344 population only, were found in non-native/invasive and native/non-invasive populations  
345 across all taxa (Fig. 3b, 3c). Trends were inconsistent across taxa; *L. camara* (*Verbenaceae*),  
346 *A. conyzoides* and *P. cattleainum* had significantly more compounds unique to invasive/non-  
347 native populations than non-invasive/native populations, whereas *M. quinquenervia*,  
348 *Myrtaceae* and *Asteraceae* showed the opposite. Patterns shown for all compounds were  
349 generally consistent across chemical clusters, although cluster 3 and 5 from the family  
350 matrix were always enriched in invasive/non-native populations. However, when equal  
351 sample sizes from the family data were compared using bootstrapping methods, generally  
352 the average number of unique-to-population compounds were greater in invasive than non-  
353 invasive populations, except for *Asteraceae*. Where compounds were enriched in invasive  
354 populations, cluster 2, 3, 5 and 6 were enriched, whereas only cluster 1 was enriched in taxa  
355 where native populations had more unique compounds. This was evidence for the average  
356 p-value from multiple exact tests. Therefore, chemodiversity radiates or contracts in  
357 invasive/non-native populations, but low-bias analysis methods suggest radiation is more  
358 common and invasive and native populations show radiation in different chemical  
359 structures.

360

**A**

| Species | Family |    |    |    |    |    |
|---------|--------|----|----|----|----|----|
|         | 1      | 2  | 3  | 4  | 5  | 6  |
| 1       | 179    | 11 | 10 |    |    |    |
| 2       |        | 53 | 48 | 23 | 12 |    |
| 3       |        |    |    |    | 27 | 16 |

**B**

| Species                                                      | Total Compounds | Compound Groups |           |           |
|--------------------------------------------------------------|-----------------|-----------------|-----------|-----------|
|                                                              |                 | Cluster 1       | Cluster 2 | Cluster 3 |
| <b>Production Changes in Invasive/Non-Native Populations</b> |                 |                 |           |           |
| <b><i>A. conyzoides</i></b>                                  |                 |                 |           |           |
| Upregulated                                                  | 3               | 2               | 1         | 0         |
| Downregulated                                                | 10              | 10*             | 0         | 0         |
| <b><i>L. camara</i></b>                                      |                 |                 |           |           |
| Upregulated                                                  | 43**            | 33**            | 10        | 0**       |
| Downregulated                                                | 29              | 22*             | 7         | 0*        |
| <b><i>M. quinquenervia</i></b>                               |                 |                 |           |           |
| Upregulated                                                  | 12              | 11              | 1         | 0         |
| Downregulated                                                | 11              | 8               | 3         | 0         |
| <b><i>P. cattleinum</i></b>                                  |                 |                 |           |           |
| Upregulated                                                  | 1               | 1               | 0         | 0         |
| Downregulated                                                | 6               | 4               | 2         | 0         |
| <b>No. Unique-to-Population Compounds Synthesised</b>        |                 |                 |           |           |
| <b>All</b>                                                   |                 |                 |           |           |
| Unique to Invasive/Non-Native Populations                    | 314****/****    | 147****         | 123**     | 44*       |
| Absent from Invasive/Non-Native Populations                  | 120****/****    | 89****          | 26**      | 5*        |
| <b><i>A. conyzoides</i></b>                                  |                 |                 |           |           |
| Unique to Non-Native Populations                             | 90****          | 53****          | 28****    | 9**       |
| Absent from Non-Native Populations                           | 7****           | 5****           | 2****     | 0**       |
| <b><i>L. camara</i></b>                                      |                 |                 |           |           |
| Unique to Invasive Populations                               | 131****         | 55*             | 49***     | 27****    |
| Absent from Invasive Populations                             | 55****          | 34*             | 17***     | 4****     |
| <b><i>M. quinquenervia</i></b>                               |                 |                 |           |           |
| Unique to Invasive Populations                               | 25*             | 13**            | 12        | 0         |
| Absent from Invasive Populations                             | 42*             | 35**            | 6         | 1         |
| <b><i>P. cattleinum</i></b>                                  |                 |                 |           |           |
| Unique to Invasive Populations                               | 68****          | 26              | 34****    | 8**       |
| Absent from Invasive Populations                             | 16****          | 15              | 1****     | 0**       |

**C**

| Species                                                                    | Total Compounds | Compound Clusters |        |      |     |       |       |
|----------------------------------------------------------------------------|-----------------|-------------------|--------|------|-----|-------|-------|
|                                                                            |                 | 1                 | 2      | 3    | 4   | 5     | 6     |
| <b>Unique-to-Population Compound Synthesis (All Profiles)</b>              |                 |                   |        |      |     |       |       |
| <b>All</b>                                                                 |                 |                   |        |      |     |       |       |
| Invasive/Non-Native                                                        | 260****/        | 84****            | 57     | 46*  | 13  | 46*** | 14    |
| Non-Invasive/Native                                                        | 295****/        | 179****           | 48     | 27*  | 17  | 17*** | 7     |
| <b>Verbenaceae</b>                                                         |                 |                   |        |      |     |       |       |
| Invasive                                                                   | 131****/****    | 46                | 25**** | 19*  | 8   | 22*** | 11*** |
| Non-Invasive                                                               | 55****/****     | 33                | 3****  | 6*   | 8   | 5***  | 0***  |
| <b>Myrtaceae</b>                                                           |                 |                   |        |      |     |       |       |
| Invasive                                                                   | 52****/****     | 13****            | 15     | 11   | 1   | 12    | 0     |
| Non-Invasive                                                               | 118****/****    | 72****            | 22     | 11   | 6   | 4     | 3     |
| <b>Asteraceae</b>                                                          |                 |                   |        |      |     |       |       |
| Non-Native                                                                 | 77****/****     | 25**              | 17**** | 16   | 4   | 12    | 3     |
| Native                                                                     | 122****/****    | 74**              | 23**** | 10   | 3   | 8     | 4     |
| <b>Bootstrapped Unique-to-Population Compounds (Equal Population Size)</b> |                 |                   |        |      |     |       |       |
| <b>Verbenaceae</b>                                                         |                 |                   |        |      |     |       |       |
| Invasive                                                                   | 92/*            | 30                | 16**   | 13.5 | 5.5 | 15*   | 8.5** |
| Non-Invasive                                                               | 61.5/*          | 37                | 4**    | 7    | 9   | 5*    | 0**   |
| <b>Myrtaceae</b>                                                           |                 |                   |        |      |     |       |       |
| Invasive                                                                   | 73/**           | 24                | 17*    | 15*  | 2   | 15*** | 0     |
| Non-Invasive                                                               | 44/**           | 27                | 6.5*   | 4.5* | 3   | 1***  | 2     |
| <b>Asteraceae</b>                                                          |                 |                   |        |      |     |       |       |
| Non-Native                                                                 | 83.5/*          | 28.5****          | 17     | 17   | 5.5 | 12    | 4     |
| Native                                                                     | 115/*           | 70.5****          | 21     | 9    | 3   | 8     | 4     |

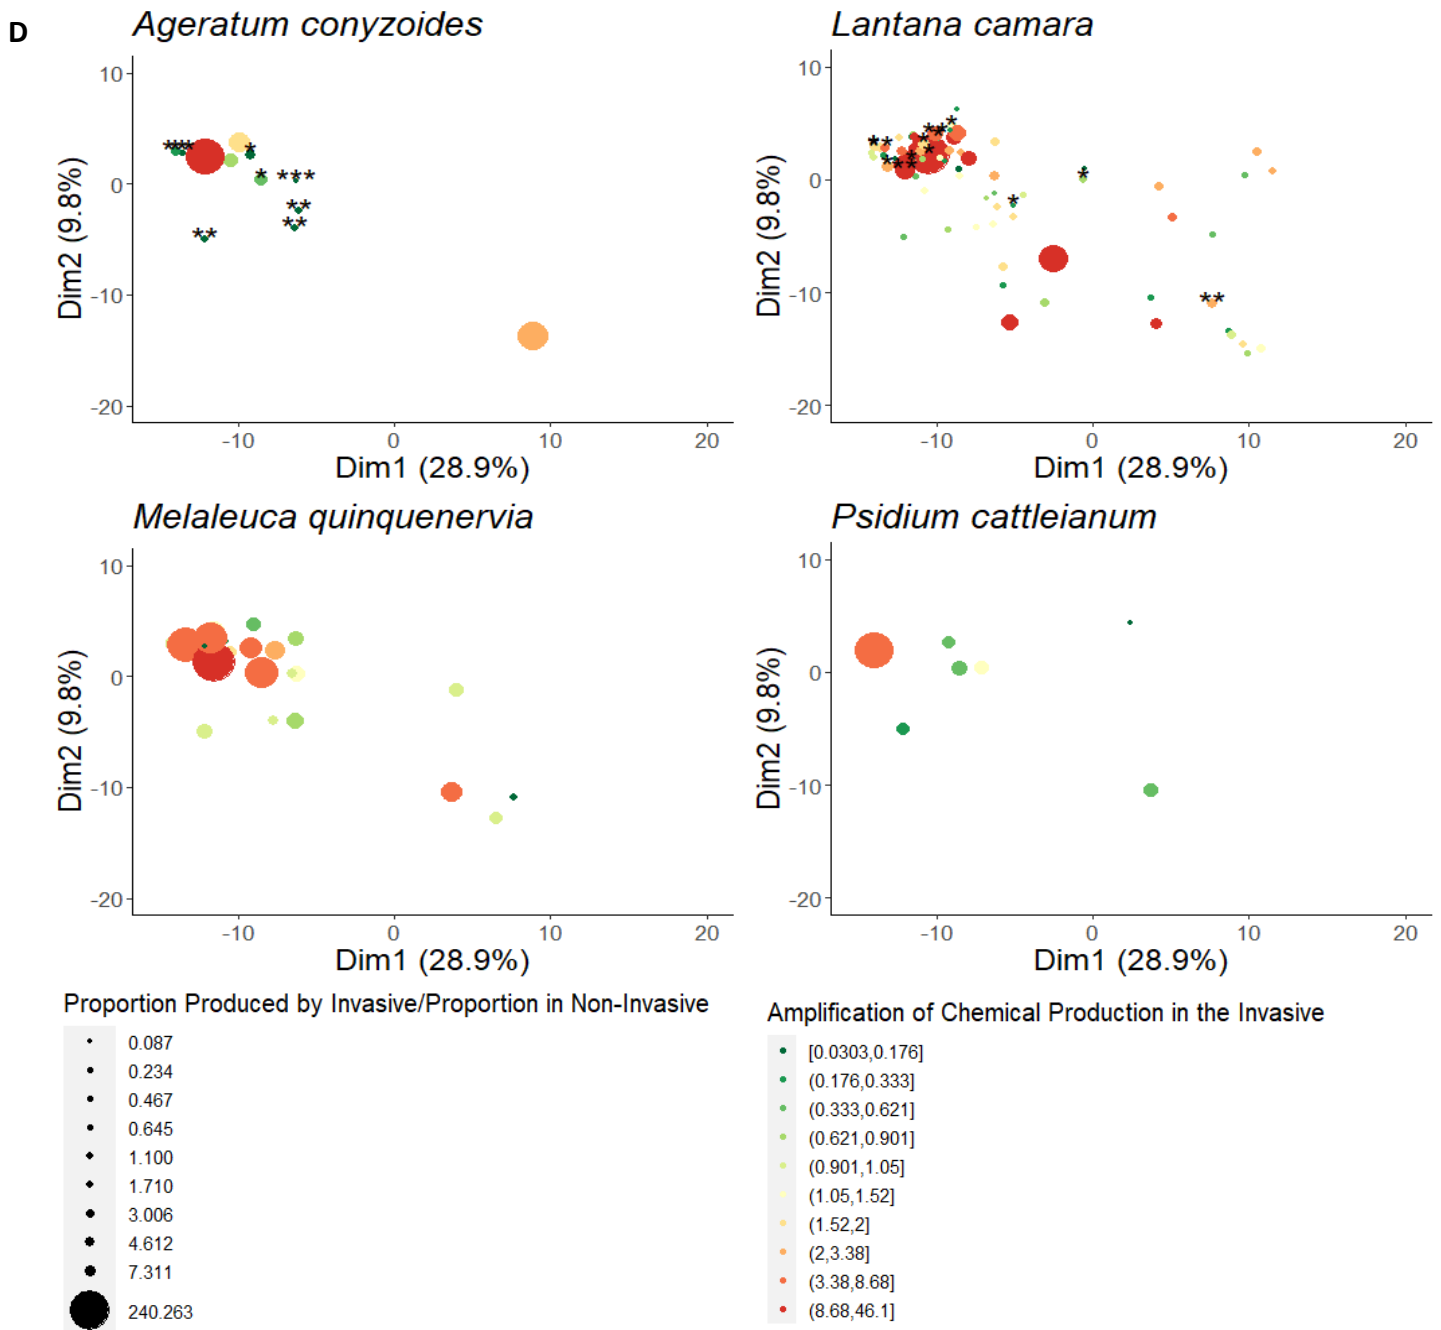

**Fig. 3.** Differences in compound production between invasive compared to non-invasive populations, or non-native compared to native populations. Compounds are grouped according to K-medoids clustering from chemical distances. (a) Table indicating the overlap in clusters between the compounds in the species matrix compared to the family matrix. (b) Species table. The first part of the table shows the number of compounds shared between populations but with differing production levels. \*  $\leq 0.05$  and \*\*  $\leq 0.01$  p-values are from exact binomial tests comparing the proportion of compounds represented by each cluster with different production between populations compared to the proportions of compounds belonging to each cluster produced in total by the invasive/non-native population. The second part of the table shows differences in unique-to-population compound production. \*  $\leq 0.05$ , \*\*  $\leq 0.01$ , \*\*\*  $\leq 0.001$  and \*\*\*\*  $\leq 0.0001$  p-values from  $\chi^2$  tests (left significance level on All Profiles) and exact binomial tests (right and for individual clusters) comparing compound synthesis between populations in total or per chemical cluster. Where two different significance levels are given, chi-square tests on unique-to-population compound synthesis for all clusters have also been computed. (c) Family table. The first part of the table shows the unique-to-population compound production with all profiles, as in (b). The second part of the table shows



the average unique-to-population compounds produced and average p-values when the matrices were bootstrapped so that sample sizes from each population were equal. (d) Chemical distribution of compounds shared between invasive and non-invasive, or non-native and native, populations from the species matrix according to relative production levels and presence of the compounds in each form. \*  $\leq 0.05$ , \*\*  $\leq 0.01$  and \*\*\*  $\leq 0.001$  p-values from Mann-Whitney tests on compound production levels between the invasive and non-invasive form. The axes and compound coordinates were determined by K-medoids clustering using pairwise chemical distances between compounds using Euclidean distance methods. The x-axis explains 28.9% and the y-axis 9.8% of the variance seen in chemical distances data. Amplification of chemical production in the invasive was calculated from comparing production rates in invasives and non-invasives that did produce the compound.

### 361 **3.5 Total variation in invasive secondary metabolomes does not** 362 **relate to non-native environments and ecology, but metabolome** 363 **chemical properties do**

364  
365 To understand some of the divergence observed in invasive populations, invasive profiles  
366 were compared to non-native environmental and ecological variables (Fig. 4). When  
367 comparing average compound production level per cluster in *L. camara* with environmental  
368 and ecological factors (Fig. 4a), cluster 1 production had little association with any factor.  
369 This was also shown using a robust linear model (RLM) and Ward tests. However, cluster 2  
370 production associated non-significantly with *Plantae* and *Animalia* SR and significantly with  
371 deforestation rate, and average monthly high and low temperature. The same patterns  
372 were observed when only compounds unique-to-invasive-population, hence involved in  
373 novel invasive population evolution, populations were considered. Cluster 1 production  
374 associated very weakly with average low temperature and deforestation but was not  
375 significantly predicted by any explanatory variables. Cluster 2 production appeared to  
376 associate with temperature, fire risk, deforestation and *Plantae* and *Animalia* SR but was  
377 only significantly predicted by average monthly high temperatures. GLM regression analysis  
378 of cluster enrichment per profile across families also showed some compound production in  
379 invasive populations associated with environmental and ecological factors (Fig. 4b). Clusters  
380 1, 2 and 4 associated with a variety of environmental and ecological factors across models,  
381 whereas clusters 3 and 5 rarely associated with any. Therefore, some variation in compound  
382 production and enrichment in structurally-similar compounds has evolved or responds  
383 plastically to non-native environments and ecology, so such compounds could be involved in  
384 local adaptation.

385

## 386 **4. Discussion**

387

388 The study of invasive plant evolution is well established, but scientific consensus on how  
389 these plants flourish in non-native environments is lacking (Zheng *et al.*, 2015). For all  
390 hypotheses of how this occurs, including the EICA and NWH, secondary metabolomes are  
391 critical in driving emergence of invasivity, as secondary metabolites mediate most plant-  
392 environment interactions. In the emergence of invasivity, plant interactions with other  
393 plants, herbivores and other organisms are lost, gained and improved to increase fitness.  
394 However, studies into plant invasivity are constrained by not investigating complete  
395 secondary metabolomes, removing compounds of interest and additive effects and  
396 interactions between metabolites. We investigated the complete variation of secondary  
397 metabolomes, or chemical profiles, of invasive and non-invasive, or native and non-native,  
398 plants in one of the first attempts to correlated chemotype to phenotype. Evolution from  
399 native to invasive phenotypes was measured by analysing changes in production, loss and  
400 gain of metabolites between non-invasive to invasive and native to non-native populations.  
401 We demonstrate studying plant chemotype reveal novel insights on plant invasivity  
402 evolution, opening directions for new research.

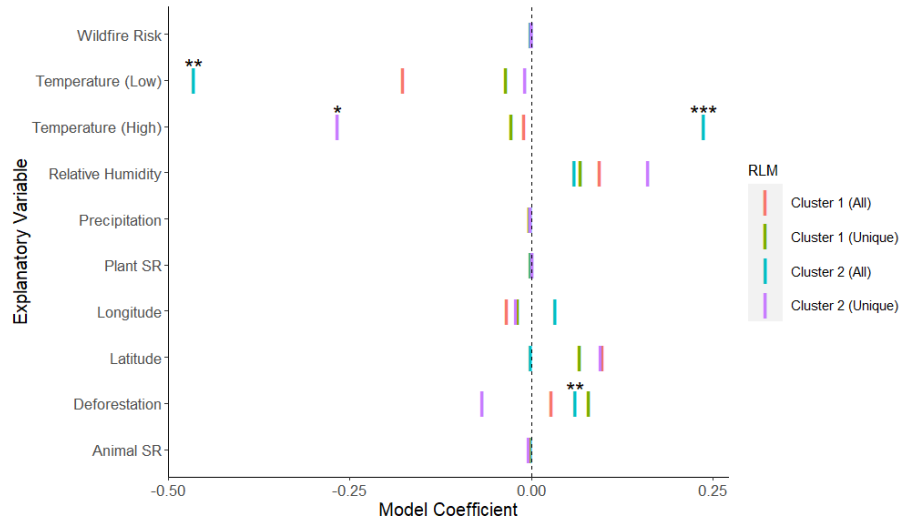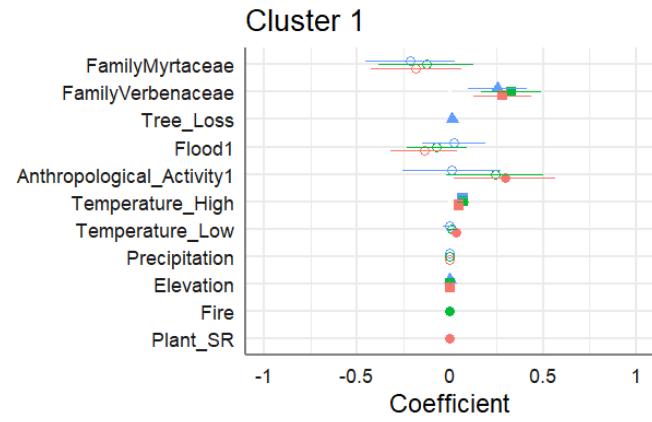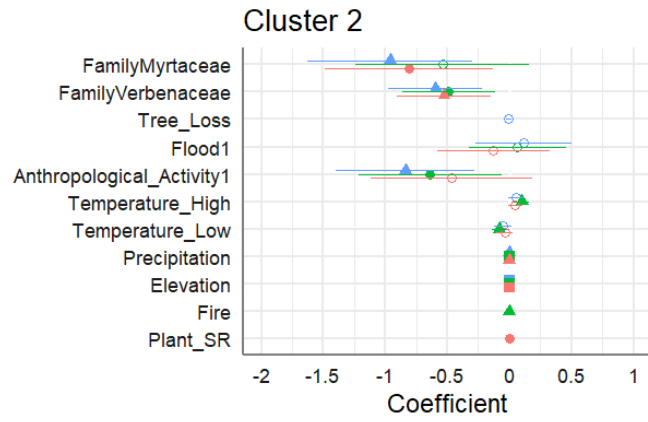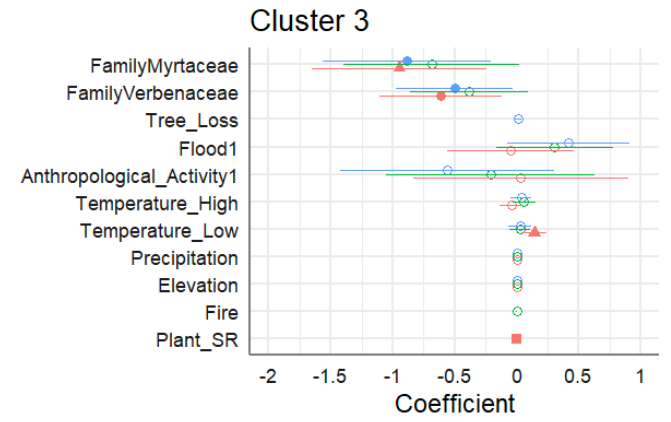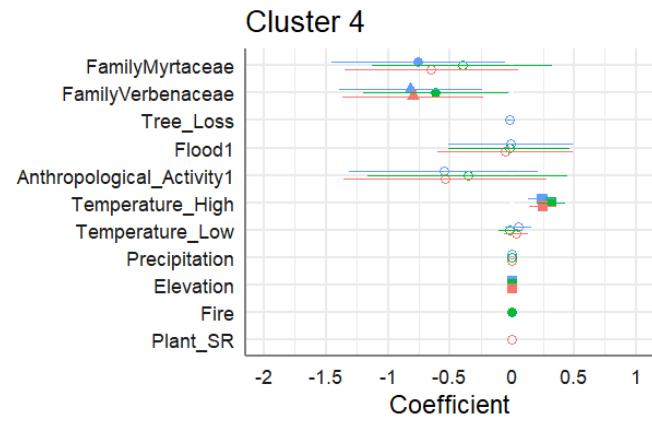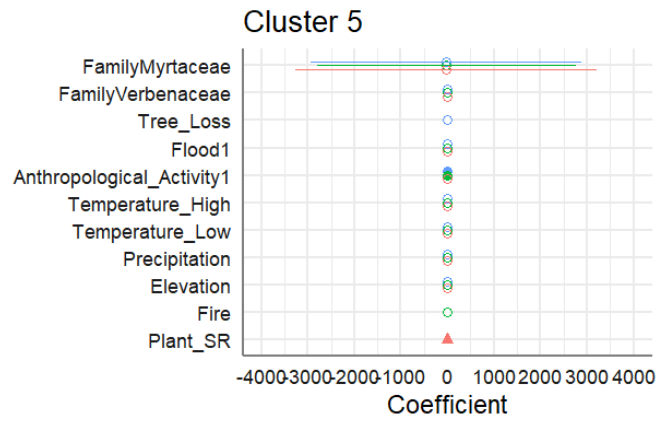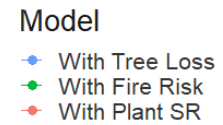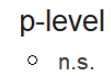

**Fig 4.** Compound distribution and production levels from invasive/non-native populations according to environmental and ecological factors. Coefficients from Robust Linear model (RLM) of average production rate of cluster 1 and 2 compounds per *L. camara* profile and average production of unique-to-invasive compounds from cluster 1 and 2 by environmental and ecological factors. \*  $\leq 0.05$ , \*\*  $\leq 0.01$ , \*\*\*  $\leq 0.001$  p-values from Ward tests on how successfully explanatory variables modelled production. (See Materials and Methods for details on the explanatory variables.) (b) Coefficients from Poisson Regression evaluating the enrichment of clusters 1-5 against plant families and environmental and ecological factors. Three separate models were made so co-linear variables were not put in the same model nor removed from the data.

403

#### 404 **4.1 There is high variation between all secondary metabolomes, but** 405 **broad evolutionary strategies are conserved in invasives**

406

407 Variation between the chemical profiles from all taxa was huge in terms of chemical  
408 composition (Fig. 1). Consistent evolutionary divergence between invasive and non-invasive  
409 populations and convergence within populations was expected, which should be reflected in  
410 chemical profile composition, but large variation was observed within as well as between  
411 populations. Additionally, total chemodiversity was biased by unequal sample sizes, where  
412 populations with greater sample sizes almost always had the greater chemodiversity.  
413 Despite this variation and confounding factors, consistent, but general, changes in  
414 secondary metabolome evolution can be observed in some taxa. Invasive individuals from *L.*  
415 *camara* and *Asteraceae* had undergone an expansion in chemodiversity, potentially  
416 diversifying plant-environment interactions. *L. camara* and *Achillea millefolium*, one of the  
417 non-native species in the *Asteraceae* family dataset, and has allelopathic and toxic  
418 properties (Rayaihi *et al.*, 2002; Sousa *et al.*, 2011); if the new compounds are involved in  
419 these processes, then NWH is proven. *M. quinquenervia* and *Myrtaceae* plants instead lost  
420 chemodiversity, suggesting specialist defence compounds have been lost and physiology  
421 and development has been invested in, so EICA could be true. Although such investment has  
422 been observed (Mishra, 2015), these results are unexpected as non-invasive populations  
423 have the greatest chemodiversity of any species, so further metabolic radiation is expected.  
424 Perhaps most of this chemodiversity can be attributed to specialist defence or metabolite  
425 genes were lost stochastically from small founder populations due to drift. *A. conyzoides*  
426 and *P. cattleianum* did not show any chemodiversity changes, so metabolites may have  
427 been lost and gained to equal degree, which could occur if NWH and EICA acted together.  
428 Therefore, metabolic evolution has occurred in invasive populations and EICA and NWH  
429 could be true to varying degrees based on the species.

430

#### 431 **4.2 Conserved changes in the functional properties of metabolomes** 432 **could induce invasivity in accordance with EICA and NWH**

433

434 Although conserved changes in the composition of chemical profiles were not observed (Fig.  
435 1, Fig. 2), we hypothesised changes in compound production and the metabolome's  
436 chemical properties to be a stronger signal for invasivity. This is because EICA states  
437 specialist defence compounds should be downregulated and the NWH states allelopathic  
438 compounds should be upregulated. Additionally, since it appears there is some stochasticity  
439 in which compounds undergo change in the invasive, there should be some functional  
440 convergence in chemotype, which could occur through structurally similar compounds being  
441 targeted for evolution. Cluster analysis showed compound production levels and chemical  
442 similarity of profiles were stronger signals of invasivity than chemical composition alone.  
443 (Fig. 2). Although there was not strong segregation of invasive and non-invasive populations,  
444 invasive and non-invasive phenotypes tended to group more separately into sub-clusters,

445 suggesting some divergence had occurred. Within sub-clusters, non-invasive populations  
446 showed greater intra-population similarity than invasive populations, implying convergent  
447 evolution might not be important to invasives, instead the radiation of metabolomic  
448 diversity was. However, in *L. camara*, profiles clustered similarly when using production or  
449 chemical similarity data, suggesting there may be functional convergence in invasive plant  
450 metabolomes. This is further shown in other species when individual compound production  
451 was analysed individually and clustered according to chemical similarity. There was an  
452 overrepresentation of compounds with altered production in cluster 1 (from the species  
453 data), lost in *M. quinquenervia*, significantly downregulated *A. conyzoides* and *L. camara* and  
454 significantly upregulated in *L. camara* invasive populations (Fig. 3). Since EICA and NWH  
455 suggest compounds of similar function, defence and allelopathy, should be down- and  
456 upregulated respectively, the evidence suggests cluster 1 compounds are involved in these  
457 functions. This is further evidenced by significantly upregulated cluster 1 compounds in *L.*  
458 *camara* that have been bio-assayed –  $\beta$ -pinene and 1,8-cineole – are involved in allelopathy  
459 (Mishra, 2015). Moreover, multiple chemical families have multi-kingdom effects, involved  
460 in defence and allelopathy (Hickman *et al.*, 2021) - cluster 1 compounds could have such  
461 effects. Therefore, structure-function relationships of metabolites have shown invasive  
462 metabolomes show evolutionary functional convergence despite diversifying. The EICA is  
463 also probably true for most species and NWH for *L. camara*.

464

### 465 **4.3 Radiation in invasive chemodiversity increases fitness of the** 466 **initial invasive phenotype and facilitates local adaptation**

467

468 There was still unexplained variation in invasive metabolomes, so we hypothesised this was  
469 caused by radiation in metabolites involved in allelopathy, as predicted by NWH (Torchin *et*  
470 *al.* 2003). Analysis of the full and bootstrapped data suggested most taxa had more unique  
471 metabolites in invasive compared to non-invasive populations. Many unique compounds  
472 clustered with the compounds with altered production in cluster 1, thought to be involved  
473 in allelopathy and defence, in the invasive populations all species. Contrastingly, chemical  
474 clustering from the family data suggested the alternative cluster 1, which has strong overlap  
475 with cluster 1 from the species data (Fig. 3a), was not enriched and instead depleted in  
476 invasive and enriched in non-invasive populations. However, alternative cluster 2 and 3  
477 were enriched in invasive populations and had overlap with cluster 1 from the species data.  
478 Alternative cluster 2 and 3 also overlap with species cluster 2, which does contain  
479 allelopathic compounds like  $\beta$ - and  $\gamma$ -curcumene (Kato-Noguchi and Kurniadie, 2021). These  
480 combined results suggest some structurally-related compounds are involved in allelopathy  
481 and defence and allelopathy that is specialist or generalist. in invasive populations, there  
482 could have been loss of some specialist interactions and evolution of unique metabolites  
483 derived from retained more generalist metabolites. This implies the NWH could be true for  
484 many taxa.

485

486 However, the expansion of other clusters is not fully explained by changes in allelopathy or  
487 generalist defence strategies. To explain this expansion, and other unexplained variation

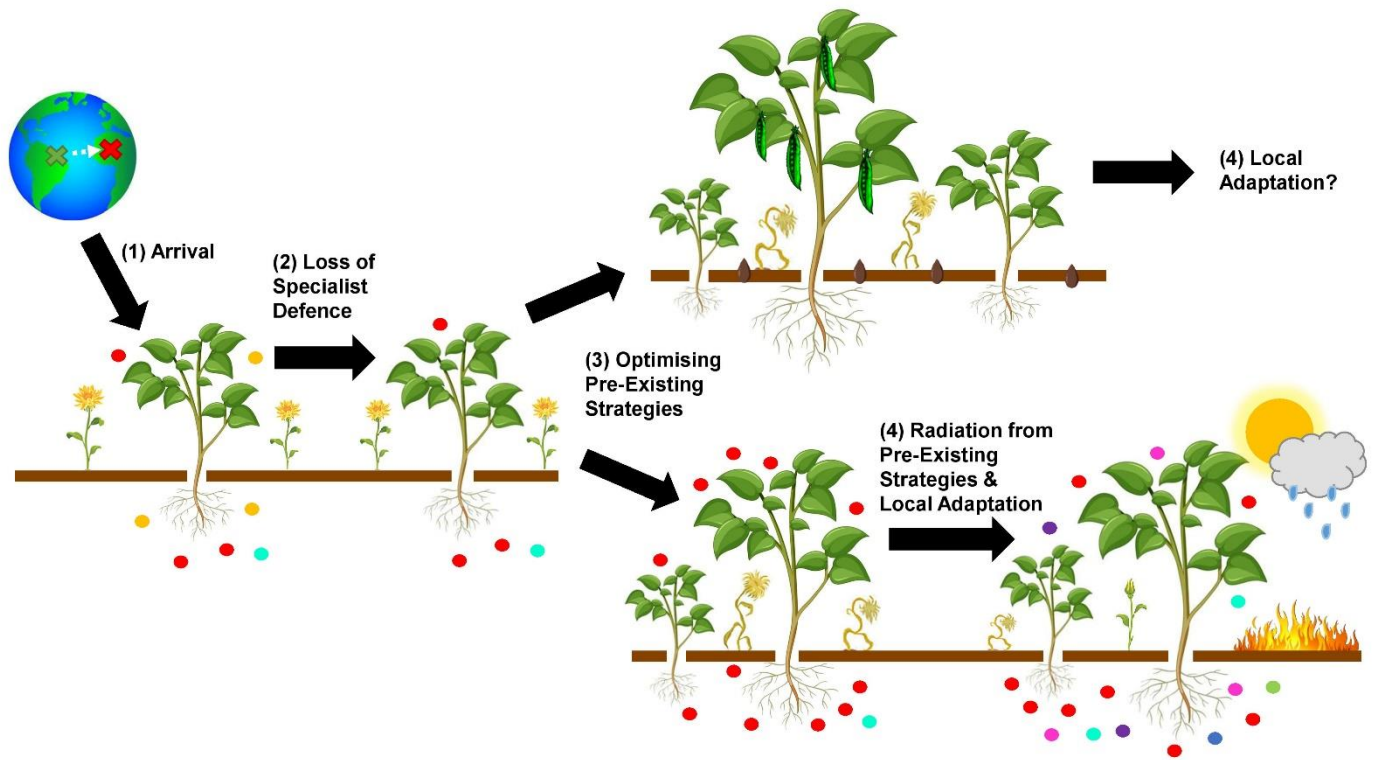

**Fig 5.** Schematic depicting plastic responses in the phenotype and the evolutionary trajectory of invasive plants.

488 between invasive profiles, evolution of invasives in response to environmental and  
489 ecological factors was also hypothesised. Modelling average production of clusters of all and  
490 unique-to-invasive compounds did show environmental and ecological factors influence  
491 invasive chemical profiles (Fig. 4a). Cluster 2 production was weakly impacted by  
492 environmental and ecological factors, but cluster 1 was not. The same pattern was observed  
493 for unique compounds. This implies some local adaptation was occurring and cluster 2 was  
494 not involved directly in general invasive aggressive strategies. It further proves cluster 1  
495 compounds were involved in allelopathy or other aggressive invasive behaviour because  
496 evolution of these metabolites would be independent of the environment and ecology if all  
497 invasive plants utilise these strategies and all non-native species are susceptible (Callaway  
498 and Ridenour, 2004). However, modelling cluster enrichment within invasive families  
499 showed most clusters correlated with environmental and ecological factors (Fig. 4b).  
500 However, alternative cluster 3, which was enriched in invasive populations, was not  
501 correlated with environmental factors, suggesting these compounds were involved in  
502 generalist invasive strategies as predicted. Alternative clusters 1 and 2 may still be involved  
503 in more specialist interactions or have more diverse roles. Therefore, invasive plants do  
504 adapt to local non-native environments, so the emergence of invasivity is not just driven by  
505 aggressive strategies that are independent of the environment.

506

507 Therefore, an evolutionary framework can be built (Fig. 5). (1) After a plant is released from  
508 the selection pressure of specialist herbivory in a non-native environment, defence  
509 compounds used against these herbivores are downregulated and lost. (2) This reduction in  
510 metabolic and genetic load allows the invasive to invest in optimising pre-existing strategies  
511 to increase competitive advantage. If the plant already has a diverse metabolome, it could  
512 increase production of compounds involved in generalist herbivore defence, allelopathy, or  
513 other plant-environment interactions. Alternatively, the invasive may further lose  
514 chemodiversity, either neutrally or beneficially, if metabolites were specialised to its native  
515 range or if the plant had low initial chemodiversity initially and invest in physiological and  
516 developmental processes that directly increase growth and reproduction. (3) Increased  
517 competitive advantage increased resource acquisition. If the invasive invested in secondary  
518 metabolism, secondary metabolites will evolve and radiate from the pre-existing invested-in  
519 pathways. This is an environment-independent strategy. In parallel, secondary metabolism  
520 evolves in response to the local environment. Environment-independent and -dependent  
521 strategies combine to produce a high fitness phenotype. This theory needs, however, needs  
522 validation by testing other species.

523

## 524 **5. Conclusions and Future Directions**

525

526 There are many theories on how invasivity emerges in plants. We discovered, using  
527 computational methods and -omics approaches, secondary metabolomes of invasive plants  
528 have diverged from non-invasive populations and each other when native selection  
529 pressures are removed. Although diversification may be important in invasive evolution,



530 invasive metabolomes appear to functionally converge to optimise invasivity potential,  
531 demonstrating a chemotype-to-phenotype relationship. Whether this was in accordance  
532 with the EICA, NWH or both varied between taxa, showing invasive evolution occurs across  
533 a spectrum of current evolutionary hypotheses. There was also evidence of local adaption to  
534 non-native environments. However, very few of the metabolites from this study have been  
535 assayed, which should be done in future to confirm these insights. Additionally, because of  
536 the lack of large datasets per taxa many computational methods like supervised machine  
537 learning could not be used, which would have been used to remove noise from unimportant  
538 compounds and identify specific compound sets driving invasivity. With such methods,  
539 potential for invasivity in non-native plants could be identified from metabolomes alone  
540 before the phenotype is apparent, a useful tool for conservationists. Therefore, improved  
541 data collection of essential oils and environmental surveying is needed so robust  
542 computational methods can be used to solidify the conclusions made in this study. Overall,  
543 however, this study emphasises the scope of multi-omics and computational approaches in  
544 producing novel insights into invasive plant evolution.

545

## 546 **Acknowledgements**

547

548 The authors would like to thank the Plant Sciences Department, University of Cambridge  
549 for facilitating the creation of this project and for providing support.

## 550 **Author Contributions**

551 J.R.C and G.Y conceived and designed this study. J.R.C, E.S and S.B collected and extracted  
552 the data. J.R.C did the computational and statistical analysis. J.R.C wrote the manuscript.

## 553 **Financial Support**

554 This research received no specific grant from any funding agency, commercial or not-for-  
555 profit sectors.

## 556 **Conflict of Interest**

557 The authors declare no conflict of interest.

558

## 559 **Data Availability Statement**

560

561 All data and code is available at [https://github.com/jamilasrc/Quantifying-the-Invasive-](https://github.com/jamilasrc/Quantifying-the-Invasive-Metabolome)  
562 [Metabolome](https://github.com/jamilasrc/Quantifying-the-Invasive-Metabolome)

563

564

565

566  
567

## References

- 568 1. **Blossey, B., & Notzold, R.** (1995). Evolution of increased competitive ability in  
569 invasive nonindigenous plants: A hypothesis. *The Journal of Ecology*, **83**, 887.  
570 <https://doi.org/10.2307/2261425>
- 571 2. **Callaway, R. M., & Ridenour, W. M.** (2004). Novel weapons: invasive success and the  
572 evolution of increased competitive ability. *Frontiers in Ecology and the Environment*,  
573 **2**, 436–443. [https://doi.org/10.1890/1540-9295\(2004\)002\[0436:NWISAT\]2.0.CO;2](https://doi.org/10.1890/1540-9295(2004)002[0436:NWISAT]2.0.CO;2)
- 574 3. **Cappuccino, N., & Arnason, J. T.** (2006). Novel chemistry of invasive exotic plants.  
575 *Biology Letters*, **2**, 189–193. <https://doi.org/10.1098/rsbl.2005.0433>
- 576 4. **Castro, M. R., Victoria, F. N., Oliveira, D. H., Jacob, R. G., Savegnago, L., & Alves, D.**  
577 (2015). Essential oil of *Psidium cattleianum* leaves: antioxidant and antifungal  
578 activity. *Pharmaceutical Biology*, **53**, 242–250.  
579 <https://doi.org/10.3109/13880209.2014.914231>
- 580 5. Copyright Holiday Weather-A-Connect Ltd. (n.d.). World Weather Averages.  
581 Weather2visit.Com; Weather 2 Visit. Retrieved December 3, 2021, from  
582 <https://www.weather2visit.com>
- 583 6. GBIF. (n.d.). Gbif.Org. Retrieved December 3, 2021, from <https://www.gbif.org>
- 584 7. **Hickman, D. T., Rasmussen, A., Ritz, K., Birkett, M. A., & Neve, P.** (2021). Review:  
585 Allelochemicals as multi-kingdom plant defence compounds: towards an integrated  
586 approach. *Pest Management Science*, **77**, 1121–1131.  
587 <https://doi.org/10.1002/ps.6076>
- 588 8. **Hull-Sanders, H. M., Clare, R., Johnson, R. H., & Meyer, G. A.** (2007). Evaluation of  
589 the evolution of increased competitive ability (EICA) hypothesis: loss of defense  
590 against generalist but not specialist herbivores. *Journal of Chemical Ecology*, **33**,  
591 781–799. <https://www.doi.org/10.1007/s10886-007-9252-y>
- 592 9. **Inderjit, Callaway, R. M., & Vivanco, J. M.** (2006). Can plant biochemistry contribute  
593 to understanding of invasion ecology? *Trends in Plant Science*, **11**, 574–580.  
594 <https://doi.org/10.1016/j.tplants.2006.10.004>
- 595 10. Invasive Species Compendium. (n.d.). Cabi.Org. Retrieved December 3, 2021, from  
596 <https://www.cabi.org/ISC>
- 597 11. **Kato-Noguchi, H., & Kurniadie, D.** (2021). Allelopathy of *Lantana camara* as an  
598 invasive plant. *Plants*, **10**, 1028. <https://doi.org/10.3390/plants10051028>
- 599 12. **Kouame, B. K. F. P., Toure, D., Kablan, L., Bedi, G., Tea, I., Robins, R., Chalchat, J. C.,  
600 & Tonzibo, F.** (2018). Chemical constituents and antibacterial activity of essential oils  
601 from flowers and stems of *ageratum conyzoides* from ivory coast. *Records of Natural  
602 Products*, **12**, 160–168. <http://doi.org/10.25135/rnp.22.17.06.040>
- 603 13. **Kumari, S., Pundhir, S., Priya, P., Jeena, G., Punetha, A., Chawla, K., Firdos Jafaree,  
604 Z., Mondal, S., & Yadav, G.** (2014). EssOilDB: a database of essential oils reflecting  
605 terpene composition and variability in the plant kingdom. *Database: The Journal of  
606 Biological Databases and Curation*, 2014, bau120.  
607 <https://doi.org/10.1093/database/bau120>

- 608 14. Kurade, N. P., Jaitak, V., Kaul, V. K., & Sharma, O. P. (2010). Chemical composition  
609 and antibacterial activity of essential oils of *Lantana camara*, *Ageratum*  
610 *houstonianum* and *Eupatorium adenophorum*. *Pharmaceutical Biology*, **48**, 539–544.  
611 <http://doi.org/10.3109/13880200903193336>
- 612 15. Lind, E. M., & Parker, J. D. (2010). Novel weapons testing: are invasive plants more  
613 chemically defended than native plants? *PLoS One*, **5**, e10429.  
614 <https://doi.org/10.1371/journal.pone.0010429>
- 615 16. Mitchell, C. E., & Power, A. G. (2003). Release of invasive plants from fungal and  
616 viral pathogens. *Nature*, **421**, 625–627. <https://doi.org/10.1038/nature01317>
- 617 17. Mishra, A. (2015). Allelopathic properties of *Lantana camara*. *International Research*  
618 *Journal of Basic and Clinical Studies*, **3**, 13-28.  
619 <http://dx.doi.org/10.14303/irjbc.2014.048>
- 620 18. Monti, D., Tampucci, S., Chetoni, P., Burgalassi, S., Bertoli, A., & Pistelli, L. (2009).  
621 Niaouli oils from different sources: analysis and influence on cutaneous permeation  
622 of estradiol in vitro. *Drug Delivery*, **16**, 237–242.  
623 <https://doi.org/10.1080/10717540902896297>
- 624 19. Parker, J. D., & Hay, M. E. (2005). Biotic resistance to plant invasions? Native  
625 herbivores prefer non-native plants. *Ecology Letters*, **8**, 959–967.  
626 <https://doi.org/10.1111/j.1461-0248.2005.00799.x>
- 627 20. Philippe, J., Goeb, P., Suvarnalatha, G., Sankar, R., & Suresh, S. (2002). Chemical  
628 composition of *Melaleuca quinquenervia* (cav.) S.T. Blake leaf oil from India. *Journal*  
629 *of Essential Oil Research*, **14**, 181–182.  
630 <https://doi.org/10.1080/10412905.2002.9699817>
- 631 21. Qin, R.-M., Zheng, Y.-L., Valiente-Banuet, A., Callaway, R. M., Barclay, G. F.,  
632 Pereyra, C. S., & Feng, Y.-L. (2013). The evolution of increased competitive ability,  
633 innate competitive advantages, and novel biochemical weapons act in concert for a  
634 tropical invader. *The New Phytologist*, **197**, 979–988.  
635 <https://doi.org/10.1111/nph.12071>
- 636 22. Rayamajhi, MB., Van, TK., Center, TD., Goolsby, JA., Pratt, PD., Racelis, A. (2002).  
637 Biological attributes of the canopy-held *Melaleuca* seeds in Australia and Florida, US.  
638 *Journal of Aquatic Plant Management*, **40**, 87-91.
- 639 23. Riaz, M., Khalid, M. R., & Chaudhary, F. M. (1995). Essential oil composition of  
640 Pakistani *Ageratum conyzoides* L. *Journal of Essential Oil Research*, **7**, 551–553.  
641 <https://doi.org/10.1080/10412905.1995.9698584>
- 642 24. Senator, S. A., & Rozenberg, A. G. (2017). Assessment of economic and  
643 environmental impact of invasive plant species. *Biology Bulletin Reviews*, **7**, 273–278.  
644 <https://doi.org/10.1134/S2079086417040089>
- 645 25. Siemann, E., & Rogers, W. E. (2003). Herbivory, disease, recruitment limitation, and  
646 success of alien and native tree species. *Ecology*, **84**, 1489–1505.  
647 [https://doi.org/10.1890/0012-9658\(2003\)084\[1489:HDRLAS\]2.0.CO;2](https://doi.org/10.1890/0012-9658(2003)084[1489:HDRLAS]2.0.CO;2)
- 648 26. Sousa, S. M., & Viccini, L. F. (2011). Cytotoxic and genotoxic activity of *Achillea*  
649 *millefolium* L., Asteraceae, aqueous extracts. *Revista Brasileira de Farmacognosia:*  
650 *Orgao Oficial Da Sociedade Brasileira de Farmacognosia*, **21**, 98–104.  
651 <https://doi.org/10.1590/S0102-695X2011005000022>

- 652 27. **Strayer, D. L., Eviner, V. T., Jeschke, J. M., & Pace, M. L.** (2006). Understanding the  
653 long-term effects of species invasions. *Trends in Ecology & Evolution*, **21**, 645–651.  
654 <https://www.doi.org/10.1016/j.tree.2006.07.007>
- 655 28. **Tesch, N. R., Mora, F., Rojas, L., Díaz, T., Velasco, J., Yáñez, C., Rios, N., Carmona, J.,**  
656 **& Pasquale, S.** (2011). Chemical composition and antibacterial activity of the  
657 essential oil of *Lantana camara* var. *moritziana*. *Natural Product Communications*, **6**,  
658 1031–1034. <https://doi.org/10.1177/1934578X1100600727>
- 659 29. The weather year round anywhere on earth. (n.d.). Weatherspark.Com. Retrieved  
660 December 3, 2021, from <https://weatherspark.com>
- 661 30. **Torchin, M. E., Lafferty, K. D., Dobson, A. P., McKenzie, V. J., & Kuris, A. M.** (2003).  
662 Introduced species and their missing parasites. *Nature*, **421**, 628–630.  
663 <https://doi.org/10.1038/nature01346>
- 664 31. Vizzuality. (n.d.). Forest monitoring, land use & deforestation trends.  
665 Globalforestwatch.Org. Retrieved December 3, 2021, from  
666 <https://www.globalforestwatch.org>
- 667 32. weatherandclimate.com. (n.d.). Weatherandclimate.Com. Retrieved December 3,  
668 2021, from <https://www.weatherandclimate.com>
- 669 33. **Zheng, Y.-L., Feng, Y.-L., Zhang, L.-K., Callaway, R. M., Valiente-Banuet, A., Luo, D.-**  
670 **Q., Liao, Z.-Y., Lei, Y.-B., Barclay, G. F., & Silva-Pereyra, C.** (2015). Integrating novel  
671 chemical weapons and evolutionarily increased competitive ability in success of a  
672 tropical invader. *The New Phytologist*, **205**, 1350–1359.  
673 <https://doi.org/10.1111/nph.13135>
- 674 34. **Zoghbi, M. das G. B., Bastos, M. de N. do C., Jardim, M. A. G., & Trigo, J. R.** (2007).  
675 Volatiles of inflorescences, leaves, stems and roots of *Ageratum conyzoides* L.  
676 Growing wild in the north of Brazil. *Journal of Essential Oil-Bearing Plants*, **10**, 297–  
677 303. <https://doi.org/10.1080/0972060X.2007.10643558>
